# Supplementary material for: Tuning atomic-scale mixing of nanoparticles produced by atmospheric-pressure spark ablation
Source: Royal Society of Chemistry journal article supplement (doi:10.1039/d3na00152k), 2023-01-01
Supplement: d3na00152k1.pdf [file d3na00152k1.pdf]

## **Electronic Supplementary Information**

### **Tuning atomic-scale mixing of Pd-Hf nanoparticles by atmospheric-pressure spark ablation**

Klito C. Petallidou<sup>a</sup>, Pau Ternero<sup>b</sup>, Maria E. Messing<sup>b</sup>,

Andreas Schmidt-Ott<sup>a,c</sup> and George Biskos<sup>\*a,d</sup>

<sup>a</sup>Climate and Atmosphere Research Centre, The Cyprus Institute, 2121 Nicosia, Cyprus

<sup>b</sup>Department of Physics and NanoLund, Lund University, 22100 Lund, Sweden

<sup>c</sup>Chemical Engineering, Delft University, 2629 HZ Delft, The Netherlands

<sup>d</sup>Faculty of Civil Engineering and Geosciences, Delft University of Technology, 2628 CN  
Delft, The Netherlands

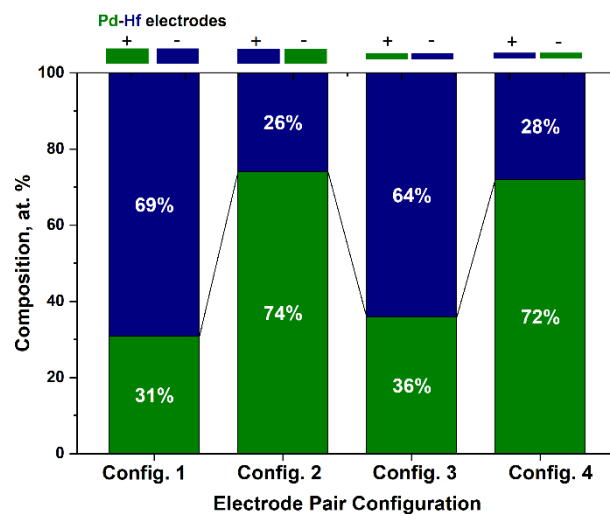

**Figure S1.** Fraction of Pd (green) and Hf (blue), estimated by the corresponding at.%, determined by gravimetric analysis for different electrode configurations, different polarity but of the same thickness. In all cases, the thick and thin electrodes had diameters of 2 and 0.25 mm, respectively.

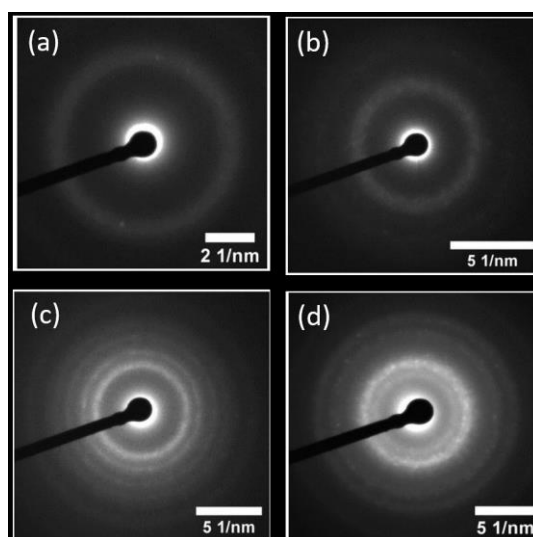

**Figure S2.** SAED patterns for different electrode configurations (a) Configuration 1: Pd (2 mm, positive) and Hf (0.25 mm, negative); (b) Configuration 2: Pd (2 mm, negative) and Hf (0.25 mm, positive); (c) Configuration 3: Pd (0.25 mm, positive) and Hf (2 mm, negative); (d) Configuration 4: Pd (0.25 mm, positive) and Hf (2mm, negative).

**Table S1.** Pd:Hf composition (at. %) estimated from TEM-EDS for different electrode configurations, different polarity and thickness. **Configuration 1:** Pd (2 mm, positive) and Hf (0.25 mm, negative); **Configuration 2:** Pd (2 mm, negative) and Hf (0.25 mm, positive); **Configuration 3:** Pd (0.25 mm, positive) and Hf (2 mm, negative); **Configuration 4:** Pd (0.25 mm, positive) and Hf (2mm, negative).

| Spectrum | Configuration 1 |           | Configuration 2 |           | Configuration 3 |           | Configuration 4 |           |
|----------|-----------------|-----------|-----------------|-----------|-----------------|-----------|-----------------|-----------|
|          | Pd (at.%)       | Hf (at.%) | Pd (at.%)       | Hf (at.%) | Pd (at.%)       | Hf (at.%) | Pd (at.%)       | Hf (at.%) |
| 1        | 46.32           | 53.68     | 44.72           | 55.28     | 57.92           | 42.08     | 75.77           | 24.23     |
| 2        | 44.94           | 55.06     | 37.53           | 62.47     | 58.94           | 41.06     | 78.46           | 21.54     |
| 3        | 46.08           | 53.92     | 48.61           | 51.39     | 57.61           | 42.39     | 73.35           | 26.65     |
| 4        | 47.38           | 52.62     | 48.40           | 51.60     | 57.00           | 43.00     | 73.67           | 26.33     |
| 5        | 61.57           | 38.43     | 35.73           | 64.27     | 61.00           | 39.00     | 72.67           | 27.33     |
| 6        | 34.00           | 66.00     | 33.03           | 66.97     | 57.20           | 42.80     | 76.92           | 23.08     |
| 7        | 41.42           | 58.58     | 36.15           | 63.85     | 55.08           | 44.92     | 73.31           | 26.69     |
| 8        | 45.71           | 54.29     | 44.96           | 55.04     | 58.25           | 41.75     | 71.40           | 28.60     |
| 9        | 41.50           | 58.50     | 40.17           | 59.83     | 63.34           | 36.66     | 74.38           | 25.62     |
| 10       | 33.18           | 66.82     | 36.36           | 63.64     | 62.28           | 37.72     | 71.91           | 28.09     |
| 11       | 34.01           | 65.99     | 41.22           | 58.78     | 57.87           | 42.13     | 77.94           | 22.06     |
| 12       | 29.61           | 70.39     | 44.67           | 55.33     | 54.01           | 45.99     | 76.43           | 23.57     |
| 13       | 33.55           | 66.45     | 38.73           | 61.27     | 59.11           | 40.89     | 73.37           | 26.63     |
| 14       | 38.47           | 61.53     | 46.47           | 53.53     | 53.65           | 46.35     | 68.97           | 31.03     |
| 15       | 29.73           | 70.27     | 42.91           | 57.09     | 60.14           | 39.86     | 72.12           | 27.88     |
| 16       | 31.15           | 68.85     | 36.14           | 63.86     | 60.86           | 39.14     | 76.50           | 23.50     |
| 17       | 26.40           | 73.60     | 33.81           | 66.19     | 59.22           | 40.78     | 71.09           | 28.91     |
| 18       | 31.86           | 68.14     | 33.78           | 66.22     | 54.82           | 45.18     | 74.08           | 25.92     |
| 19       | 35.03           | 64.97     | 34.07           | 65.93     | 61.86           | 38.14     | 72.12           | 27.88     |
| 20       | 37.80           | 62.20     | 40.87           | 59.13     | 56.12           | 43.88     | 73.16           | 26.84     |

**Table S2.** Pd:Hf composition (at. %) estimated from STEM-EDS for different electrode configurations, different polarity and thickness. **Configuration 1:** Pd (2 mm, positive) and Hf (0.25 mm, negative);

| Spectrum | Pd (at.%) | Hf (at.%) |
|----------|-----------|-----------|
|----------|-----------|-----------|

|           |       |       |
|-----------|-------|-------|
| <b>1</b>  | 40.03 | 59.97 |
| <b>2</b>  | 41.56 | 58.44 |
| <b>3</b>  | 55.74 | 44.26 |
| <b>4</b>  | 57.10 | 42.90 |
| <b>5</b>  | 71.62 | 28.38 |
| <b>6</b>  | 48.09 | 51.91 |
| <b>7</b>  | 55.88 | 44.12 |
| <b>8</b>  | 49.20 | 50.80 |
| <b>9</b>  | 33.49 | 66.51 |
| <b>10</b> | 26.12 | 73.88 |
| <b>11</b> | 45.41 | 54.59 |
| <b>12</b> | 56.29 | 43.71 |
| <b>13</b> | 36.43 | 63.57 |
| <b>14</b> | 50.22 | 49.78 |
| <b>15</b> | 55.18 | 44.82 |
| <b>16</b> | 49.58 | 50.42 |
| <b>17</b> | 50.45 | 49.55 |
| <b>18</b> | 47.00 | 53.00 |
| <b>19</b> | 41.88 | 58.12 |
| <b>20</b> | 51.87 | 48.13 |
| <b>21</b> | 52.55 | 47.45 |
| <b>22</b> | 50.11 | 49.89 |
| <b>23</b> | 67.61 | 32.39 |
| <b>24</b> | 67.00 | 33.00 |
| <b>25</b> | 44.34 | 55.66 |
| <b>26</b> | 29.06 | 70.94 |
| <b>27</b> | 59.36 | 40.64 |

|           |       |       |
|-----------|-------|-------|
| <b>28</b> | 27.69 | 72.31 |
| <b>29</b> | 28.38 | 71.62 |
| <b>30</b> | 41.53 | 58.47 |
| <b>31</b> | 67.55 | 32.45 |
| <b>32</b> | 47.60 | 52.40 |
| <b>33</b> | 35.24 | 64.76 |
| <b>34</b> | 23.59 | 76.41 |
| <b>35</b> | 43.72 | 56.28 |

**Table S3.** Pd:Hf composition (at. %) estimated from STEM-EDS for different electrode configurations, different polarity and thickness. **Configuration 2:** Pd (2 mm, negative) and Hf (0.25 mm, positive)

| <b>Spectrum</b> | <b>Pd (at.%)</b> | <b>Hf (at.%)</b> |
|-----------------|------------------|------------------|
| <b>1</b>        | 40.43            | 59.57            |
| <b>2</b>        | 41.17            | 58.83            |
| <b>3</b>        | 46.56            | 53.44            |
| <b>4</b>        | 53.03            | 46.97            |
| <b>5</b>        | 66.79            | 33.21            |
| <b>6</b>        | 25.86            | 74.14            |
| <b>7</b>        | 43.23            | 56.77            |
| <b>8</b>        | 37.45            | 62.55            |
| <b>9</b>        | 35.51            | 64.49            |
| <b>10</b>       | 48.48            | 51.52            |
| <b>11</b>       | 54.65            | 45.35            |
| <b>12</b>       | 40.93            | 59.07            |
| <b>13</b>       | 52.49            | 47.51            |
| <b>14</b>       | 51.87            | 48.13            |
| <b>15</b>       | 41.50            | 58.50            |
| <b>16</b>       | 58.50            | 41.50            |

|           |       |       |
|-----------|-------|-------|
| <b>17</b> | 52.01 | 47.99 |
| <b>18</b> | 48.85 | 51.15 |
| <b>19</b> | 34.35 | 65.65 |
| <b>20</b> | 56.31 | 43.69 |
| <b>21</b> | 61.12 | 38.88 |
| <b>22</b> | 39.91 | 60.09 |
| <b>23</b> | 54.78 | 45.22 |
| <b>24</b> | 49.26 | 50.74 |
| <b>25</b> | 45.43 | 54.57 |
| <b>26</b> | 41.32 | 58.68 |
| <b>27</b> | 38.63 | 61.37 |
| <b>28</b> | 64.23 | 35.77 |
| <b>29</b> | 48.32 | 51.68 |
| <b>30</b> | 39.10 | 60.90 |
| <b>31</b> | 41.23 | 58.77 |
| <b>32</b> | 49.88 | 50.12 |
| <b>33</b> | 73.48 | 26.52 |
| <b>34</b> | 53.58 | 46.42 |
| <b>35</b> | 50.39 | 49.61 |
| <b>36</b> | 48.40 | 51.60 |
| <b>37</b> | 50.59 | 49.41 |
| <b>38</b> | 55.36 | 44.64 |
| <b>39</b> | 43.58 | 56.42 |
| <b>40</b> | 51.87 | 48.13 |
| <b>41</b> | 61.58 | 38.42 |
| <b>42</b> | 52.74 | 47.26 |
| <b>43</b> | 42.71 | 57.29 |

|           |       |       |
|-----------|-------|-------|
| <b>44</b> | 52.14 | 47.86 |
|-----------|-------|-------|

**Table S4.** Pd:Hf composition (at. %) estimated from STEM-EDS for different electrode configurations, different polarity and thickness. **Configuration 3:** Pd (0.25 mm, positive) and Hf (2 mm, negative)

| <b>Spectrum</b> | <b>Pd (at.%)</b> | <b>Hf (at.%)</b> |
|-----------------|------------------|------------------|
| <b>1</b>        | 64.35            | 35.65            |
| <b>2</b>        | 71.14            | 28.86            |
| <b>3</b>        | 68.77            | 31.23            |
| <b>4</b>        | 58.22            | 41.78            |
| <b>5</b>        | 78.22            | 21.78            |
| <b>6</b>        | 57.00            | 43.00            |
| <b>7</b>        | 79.63            | 20.37            |
| <b>8</b>        | 58.68            | 41.32            |
| <b>9</b>        | 64.87            | 35.13            |
| <b>10</b>       | 66.42            | 33.58            |
| <b>11</b>       | 81.68            | 18.32            |
| <b>12</b>       | 76.16            | 23.84            |
| <b>13</b>       | 81.34            | 18.66            |
| <b>14</b>       | 59.37            | 40.63            |
| <b>15</b>       | 70.57            | 29.43            |
| <b>16</b>       | 65.34            | 34.66            |
| <b>17</b>       | 68.57            | 31.43            |
| <b>18</b>       | 65.51            | 34.49            |
| <b>19</b>       | 82.51            | 17.49            |
| <b>20</b>       | 64.63            | 35.37            |
| <b>21</b>       | 67.03            | 32.97            |
| <b>22</b>       | 62.67            | 37.33            |
| <b>23</b>       | 68.36            | 31.64            |

|           |       |       |
|-----------|-------|-------|
| <b>24</b> | 75.33 | 24.67 |
| <b>25</b> | 62.62 | 37.38 |
| <b>26</b> | 79.29 | 20.71 |
| <b>27</b> | 80.02 | 19.98 |
| <b>28</b> | 56.07 | 43.93 |
| <b>29</b> | 32.67 | 67.33 |
| <b>30</b> | 81.74 | 18.26 |
| <b>31</b> | 64.55 | 35.45 |

**Table S5.** Pd:Hf composition (at. %) estimated from STEM-EDS for different electrode configurations, different polarity and thickness. **Configuration 4:** Pd (0.25 mm, positive) and Hf (2mm, negative).

| <b>Spectrum</b> | <b>Pd (at.%)</b> | <b>Hf (at.%)</b> |
|-----------------|------------------|------------------|
| <b>1</b>        | 84.51            | 15.49            |
| <b>2</b>        | 74.14            | 25.86            |
| <b>3</b>        | 75.29            | 24.71            |
| <b>4</b>        | 61.47            | 38.53            |
| <b>5</b>        | 79.47            | 20.53            |
| <b>6</b>        | 85.24            | 14.76            |
| <b>7</b>        | 79.11            | 20.89            |
| <b>8</b>        | 84.27            | 15.73            |
| <b>9</b>        | 87.52            | 12.48            |
| <b>10</b>       | 75.14            | 24.86            |
| <b>11</b>       | 76.20            | 23.80            |
| <b>12</b>       | 60.84            | 39.16            |
| <b>13</b>       | 78.81            | 21.19            |
| <b>14</b>       | 77.76            | 22.24            |
| <b>15</b>       | 73.03            | 26.97            |
| <b>16</b>       | 83.12            | 16.88            |



|           |       |       |
|-----------|-------|-------|
| <b>17</b> | 63.24 | 36.76 |
| <b>18</b> | 78.26 | 21.74 |
| <b>19</b> | 80.79 | 19.21 |
| <b>20</b> | 87.33 | 12.67 |
